# Supplementary material for: The Role of Gut Microbiome in Psoriasis: Oral Administration of Staphylococcus aureus and Streptococcus danieliae Exacerbates Skin Inflammation of Imiquimod-Induced Psoriasis-Like Dermatitis
Source: MDPI journal article supplement (doi:10.3390/ijms21093303), 2020-05-07
Supplement: s1 [file s1]

Supplementary Figure

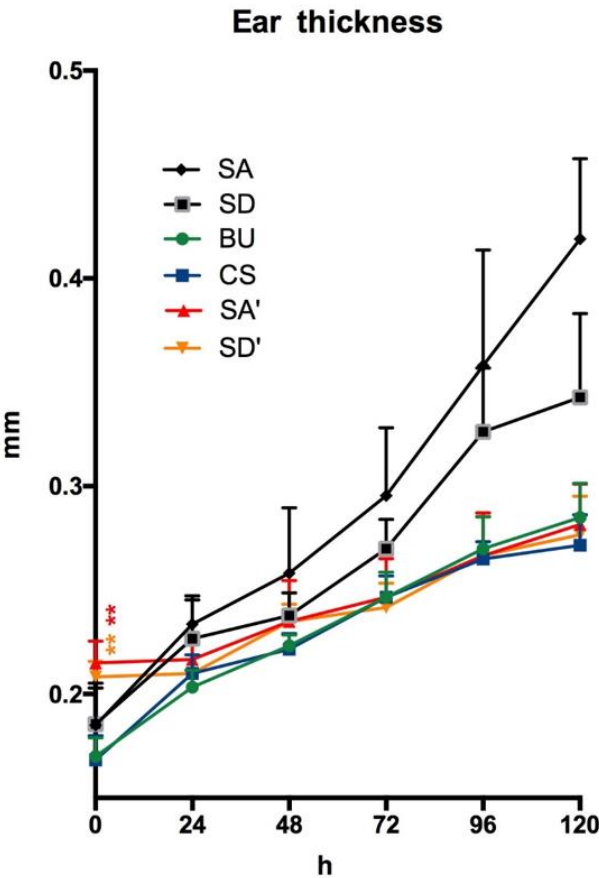

Figure S1: SA' and SD' were significantly thicker at 0hrs than BU and CS. At 72 hrs and 120hrs SA' and SD' had no significant difference than BU and CS. (\*\*  $p < 0.01$ )

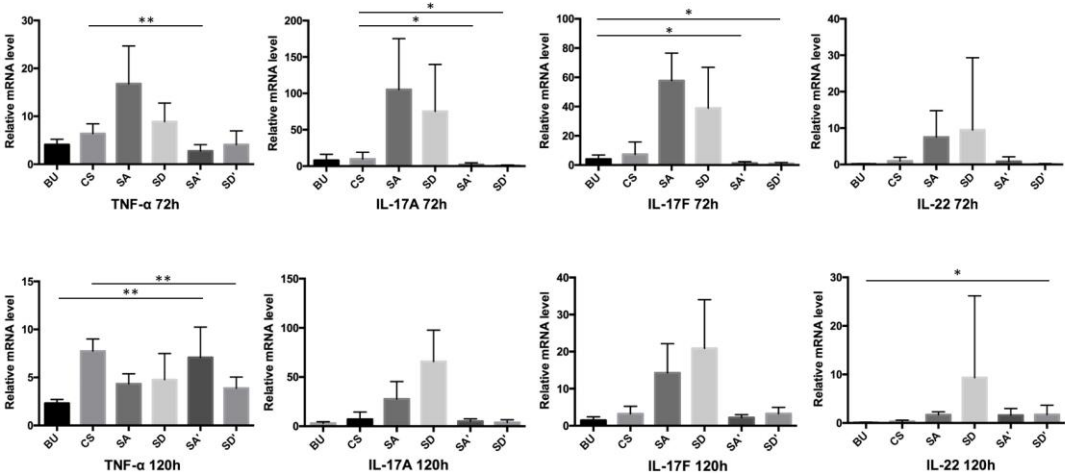

Figure S2: At 72hrs, SA' and SD' presented significantly lower TNF, IL-17A, IL-17F than BU and CS. At 120hrs, TNF-  $\alpha$  was higher for SA' than BU but SD' was lower than CS. (\*  $p < 0.05$ , \*\*  $p < 0.01$ )

Note: Significance is only compared between SA' and SD' and BU and CS on these figure.
